# Supplementary material for: Seizure Detection and Tracking Through Portable Technologies: Protocol for a Systematic Review
Source: Research Square preprint supplement (doi:10.21203/rs.3.rs-66216/v2), 2021-02-10
Supplement: Supplementary file 1 [file dd56c57eaf1d87ca0bd9b21d.docx]

**APPENDIX 1 – SEARCH STRATEGY (MEDLINE)**

**1ST QUESTION**

"Status Epilepticus/prevention and control"[Mesh:NoExp] OR "Status Epilepticus/diagnosis"[Mesh:NoExp] OR "Seizures/diagnosis"[Mesh:NoExp] OR "Seizures/prevention and control"[Mesh:NoExp]) OR Seizure* tracking[TIAB] OR Seizure* detection[TIAB] OR OR Seizure* prevention[TIAB] OR Non-Epileptic Seizures[TIAB] OR ("Death, Sudden/prevention and control"[Mesh] AND "Epilepsy"[Mesh]) OR Sudden unexpected death in epilepsy[TIAB] OR PNES[TIAB] OR SUDEP[TIAB]

AND

"Electroencephalography"[Mesh:NoExp] OR Electroencephalography[TIAB] OR EEG[TIAB] OR non-EEG[TIAB] OR "Electrocardiography"[Mesh:NoExp] OR Electrocardiography[TIAB] OR ECG[TIAB] OR EKG[TIAB] OR "Electrocardiography, Ambulatory"[Mesh] OR "Cortical Synchronization"[Mesh] OR Cortical development[TIAB] OR OR Cortical Synchronization[TIAB] OR "Video Recording"[Mesh:NoExp] OR Video[TIAB] OR Camera*[TIAB] OR "Artificial Intelligence"[Mesh:NoExp] OR "Algorithms"[Mesh:NoExp] OR Artificial Intelligence[TIAB] OR Algorithms[TIAB] OR "Wearable Electronic Devices"[Mesh] OR devices[TIAB] OR Neuromuscular Monitoring[Mesh] OR "Monitoring, Physiologic"[Mesh:NoExp] OR  Accelerometer*[TIAB] OR "Electromyography"[Mesh:NoExp] OR Electromyograph*[TIAB] OR Electromyogram*[TIAB] OR "Galvanic Skin Response"[Mesh] OR electrodermal activity[TIAB] OR Alert*[TIAB] OR Automated seizure[TIAB]

**2ND QUESTION**

"Status Epilepticus/prevention and control"[Mesh:NoExp] OR "Status Epilepticus/diagnosis"[Mesh:NoExp] OR "Seizures/diagnosis"[Mesh:NoExp] OR "Seizures/prevention and control"[Mesh:NoExp]) OR Seizure* tracking[TIAB] OR Seizure* detection[TIAB] OR OR Seizure* prevention[TIAB] OR Non-Epileptic Seizures[TIAB] OR ("Death, Sudden/prevention and control"[Mesh] AND "Epilepsy"[Mesh]) OR Sudden unexpected death in epilepsy[TIAB] OR PNES[TIAB] OR SUDEP[TIAB]

AND

(((("Health Personnel"[Mesh:NoExp]) OR "Health Educators"[Mesh]) OR "Medical Staff"[Mesh]) OR "Nurses"[Mesh]) OR "Neurologists"[Mesh] OR "Caregivers"[Mesh] OR "Parents"[Mesh] OR "Patients"[Mesh] OR "Nurse's Role"[Mesh] OR "Physicians"[Mesh:NoExp] OR Health Personnel[TIAB] OR Health Educators[TIAB] OR Medical staff [TIAB] OR Nurses[TIAB]) OR Neurologists[TIAB] OR Caregivers[TIAB] OR Parents[TIAB] OR Patients[TIAB] OR Physicians[TIAB]

AND

"Attitude"[Mesh:NoExp] OR "Attitude to Health"[Mesh] OR "Health Services Needs and Demand"[Mesh] OR "Needs Assessment"[Mesh] OR ( "Perception/diagnosis"[Mesh:NoExp] OR "Perception/prevention and control"[Mesh:NoExp] OR "Perception/therapy"[Mesh:NoExp] ) OR "Social Perception"[Mesh] OR "Body Image"[Mesh] OR "Discrimination (Psychology)"[Mesh] OR Attitude [TIAB] OR Attitude to Health[TIAB] OR Health Services Needs and Demand[TIAB] OR Needs Assessment[TIAB] OR (Perception/diagnosis [TIAB] OR Perception/prevention and control[TIAB] OR Perception/therapy [TIAB]) OR Social Perception [TIAB] OR Body Image [TIAB] OR Discrimination (Psychology) [TIAB] OR "Quality of Life"[Mesh] OR Quality of Life [TIAB] OR Well-being [TIAB] OR Wellbeing [TIAB]

**3RD QUESTION**

"Status Epilepticus/prevention and control"[Mesh:NoExp] OR "Status Epilepticus/diagnosis"[Mesh:NoExp] OR "Seizures/diagnosis"[Mesh:NoExp] OR "Seizures/prevention and control"[Mesh:NoExp]) OR Seizure* tracking[TIAB] OR Seizure* detection[TIAB] OR OR Seizure* prevention[TIAB] OR Non-Epileptic Seizures[TIAB] OR ("Death, Sudden/prevention and control"[Mesh] AND "Epilepsy"[Mesh]) OR Sudden unexpected death in epilepsy[TIAB] OR PNES[TIAB] OR SUDEP[TIAB]

AND

Motivator* [TIAB] OR "Motivation"[Mesh:NoExp] OR Motivation [TIAB] OR "Aspirations (Psychology)"[Mesh] OR "Psychology, Applied"[Mesh:NoExp] OR "Communication Barriers"[Mesh:NoExp] OR Obstacle* [TIAB] OR Barrier* [TIAB] OR limit* [TIAB] OR Nuisance [TIAB] OR "Mobility Limitation"[Mesh] OR Challenge* [TIAB] OR Moderating factor* [TIAB] OR "Sociological Factors"[Mesh:NoExp]

AND

"Technology"[Mesh:NoExp] OR "Automation"[Mesh] OR "Wireless Technology"[Mesh] OR Wireless Technology [TIAB] OR Portable solution [TIAB] OR ( "Behavior/diagnosis"[Mesh:NoExp] OR "Behavior/education"[Mesh:NoExp] OR "Behavior/instrumentation"[Mesh:NoExp] OR "Behavior/nursing"[Mesh:NoExp] OR "Behavior/physiopathology"[Mesh:NoExp] OR "Behavior/prevention and control"[Mesh:NoExp] OR "Behavior/standards"[Mesh:NoExp] OR "Behavior/therapeutic use"[Mesh:NoExp] OR "Behavior/therapy"[Mesh:NoExp] ) OR "Health Behavior"[Mesh:NoExp].

*Different filter for RCT will be used for EMBASE and CENTRAL
